# Supplementary material for: Structural controls on OH site availability and reactivity at iron oxyhydroxide particle surfaces
Source: Royal Society of Chemistry journal article supplement (doi:10.1039/c2cp22715k), 2012-01-01
Supplement: c2cp22715k.pdf [file c2cp22715k.pdf]

## SUPPORTING INFORMATION

### Structural controls on OH site availability and reactivity at iron oxyhydroxide particle surfaces

Xiaowei Song and Jean-François Boily\*

Department of Chemistry  
Umeå University  
SE-901 87 Umeå  
Sweden

\* corresponding author: +46 (0)90 786 5270, jean-francois.boily@chem.umu.se

#### Description of force field model and parameters

Potential energy was calculated as the sum of non-bonded (Coulombic and van der Waals) and bonded (bond stretch and bend) interactions. Coulombic energy is expressed as:

$$V_C(\mathbf{r}_{ij}) = \frac{q_i \cdot q_j}{f \cdot r_{ij}} \quad [1]$$

where  $f=4\pi\epsilon_0\epsilon_p e^{-2}$ ,  $\epsilon_0$  is the permittivity of vacuum,  $\epsilon_p$  the relative dielectric constant and  $e$  elementary charge. Van der Waals energy is represented by the Lennard-Jones (12-6) function:

$$V_{LJ}(\mathbf{r}_{ij}) = 4\epsilon_{ij} \left( \left( \frac{\sigma_{ij}}{r_{ij}} \right)^{12} - \left( \frac{\sigma_{ij}}{r_{ij}} \right)^6 \right) \quad [2]$$

using Lorentz-Berthelot mixing rules:

$$\sigma_{ij} = \frac{1}{2}(\sigma_{ii} + \sigma_{jj}) \quad [3]$$

$$\epsilon_{ij} = \sqrt{\epsilon_{ii}\epsilon_{jj}} \quad [4]$$

Finally the bonded potential energies were described by harmonic stretches

$$V_b(r_{ij}) = \frac{1}{2} k_{ij}^b (r_{ij} - b_{ij})^2 \quad [5]$$

for all hydroxyls (O-H), and harmonic bends

$$V_a(\theta_{ijk}) = \frac{1}{2} k_{ijk}^\theta (\theta_{ijk} - \theta_{ijk}^\theta)^2 \quad [6]$$

in water (H-O-H) and bulk Fe-O-H. All modeling parameters are reported in Table 4.

## References

- 1 Cygan, R. T.; Liang, J. J.; Kalinichev, A. G. *J. Phys. Chem. B* **2004**, *108* (4), 1255-1266.
- 2 Kerisit, S. *Geochim. Cosmochim. Ac.* **2011**, *75* (8), 2043-2061.
- 3 Berendsen, H. J. C.; Grigera, J. R.; Straatsma, T. P. *J. Phys. Chem.* **1987**, *91* (24), 6269-6271.)
- 4 Berendsen, H. J. C.; Postma, J. P. M.; Gunsterenand, W. F.; Hermans, J., In *Intermolecular Forces*, Pullman, B., Ed. D. Riedel Publishing Company: Dordrecht, The Netherlands, 1981; pp 331-342.
- 5 H. Yang, R. Lu, R. T. Downs and G. Costin, *Acta Crystallog. E*, 2006, **62**, i250-i252.
- 6 Wyckoff, R. W. G, *Crystal Structures I*, Interscience Publishers: New York, 1963; pp 290-295.

## TABLES

**Table S1** Effects of protonation on surface OH stretching of LL

| Spectra | Hads<br>(protons/nm <sup>2</sup> ) | Bands (cm <sup>-1</sup> ) |           |           |           |           |
|---------|------------------------------------|---------------------------|-----------|-----------|-----------|-----------|
|         |                                    | • <sup>α</sup><br>3667    | ○<br>3625 | ⌋<br>3552 | ⌋<br>3534 | ⌋<br>3645 |
| Aa      | -13.86                             | • <sup>β</sup>            | •         | •         | •         |           |
| Ab      | -2.59                              | ↓                         | -         | -         | -         |           |
| Ac      | 0.00                               | ↓                         | -         | -         | -         |           |
| Ad      | 2.29                               | ↓                         | -         | -         | -         | •         |
| Ae      | 18.17                              | ⊥                         | ↓         | -         | -         | ↑         |
| Af      | 36.11                              |                           | ↓         | -         | -         | -         |
| Ag      | 53.15                              |                           | ↓         | -         | -         | -         |
| Ah      | 143.23                             |                           | ↓         | -         | -         | -         |
| Ai      | 312.99                             |                           | ↓         | -         | -         | -         |

α. Numbers in circles are the label numbers in Fig. 3-a.

β. Behavior of bands expressed as:

- : Present in (Aa) or appeared; ⊥: Disappeared; -: Unchanged relative to previous spectrum
- ↑: Increased relative to previous spectrum; ↓: Decreased relative to previous spectrum

**Table S2** Effects of protonation on surface OH stretching of RL

| Spectra | Hads<br>(protons/nm <sup>2</sup> ) | Bands (cm <sup>-1</sup> ) |           |           |           |           |           |
|---------|------------------------------------|---------------------------|-----------|-----------|-----------|-----------|-----------|
|         |                                    | • <sup>α</sup><br>366     | ○<br>3626 | ⌋<br>3550 | ⌋<br>3534 | ●<br>3654 | ●<br>3646 |
| Ba      | -7.85                              | • <sup>β</sup>            | •         | •         | •         |           |           |
| Bb      | -4.59                              | ↓                         | -         | -         | -         |           |           |
| Bc      | -0.48                              | ↓                         | -         | -         | -         |           |           |
| Bd      | 0.00                               | ↓                         | -         | -         | -         |           |           |
| Be      | 0.24                               | ↓                         | -         | -         | -         |           |           |
| Bf      | 2.23                               | ↓                         | -         | -         | -         | •         |           |
| Bg      | 4.59                               | ↓                         | -         | -         | -         | ↓         |           |
| Bh      | 9.10                               | ↓                         | -         | -         | -         | ↓         |           |
| Bi      | 17.82                              | ↓                         | ↓         | -         | -         | ↓         |           |
| Bj      | 26.08                              | ↓                         | ↓         | -         | -         | ↓         |           |
| Bk      | 35.67                              | ⊥                         | ↓         | -         | -         | ↓         |           |
| Bl      | 69.44                              |                           | ↓         | -         | -         | ⊥         | •         |
| Bm      | 141.13                             |                           | ↓         | -         | -         |           | ↓         |

α. Numbers in circles are the label numbers in Fig. 3-b.

β. Behavior of bands expressed as:

- : Present in (Ba) or appeared; ⊥: Disappeared; -: Unchanged relative to previous spectrum
- ↑: Increased relative to previous spectrum; ↓: Decreased relative to previous spectrum



**Table S3** Effects of protonation on surface OH stretching of G

| Spectra | Hads<br>(protons/nm <sup>2</sup> ) | Bands (cm <sup>-1</sup> ) |           |           |           |           |           |
|---------|------------------------------------|---------------------------|-----------|-----------|-----------|-----------|-----------|
|         |                                    | • <sup>α</sup><br>3661    | ○<br>3648 | ⌋<br>3491 | ⌋<br>3545 | ⌋<br>3576 | †<br>3585 |
| Ca      | -12.00                             | ● <sup>β</sup>            | ●         | ●         |           |           |           |
| Cb      | -3.35                              | ↓                         | -         | ↓         |           |           |           |
| Cc      | -1.18                              | ↓                         | -         | ↓         |           |           |           |
| Cd      | 0.00                               | ↓                         | -         | ↓         |           |           |           |
| Ce      | 0.48                               | ↓                         | -         | ↓         |           |           |           |
| Cf      | 1.18                               | 3658                      | -         | ↓         | ●         |           |           |
| Cg      | 3.00                               | ↓                         | -         | ⊥         | ↑         |           |           |
| Ch      | 6.18                               | ↓                         | -         |           | -         | ●         |           |
| Ci      | 9.11                               | ↓                         | -         |           | ↓         | ↑         |           |
| Cj      | 12.18                              | ↓                         | -         |           | ↓         | ↑         |           |
| Ck      | 15.03                              | ↓                         | -         |           | ↓         | ↓         |           |
| Cl      | 17.88                              | ⊥                         | ↓         |           | ⊥         | ↓         | ●         |
| Cm      | 20.46                              |                           | ↓         |           |           | ⊥         | ↓         |
| Cn      | 30.90                              |                           | ↓         |           |           |           | ↓         |
| Co      | 102.80                             |                           | ↓         |           |           |           | ⊥         |
| Cp      | 217.04                             |                           | ↓         |           |           |           | ⊥         |

α. Numbers in circles are the label numbers in Fig. 3-c.

β. Behavior of bands expressed as:

- : Present in (Ca) or appeared; ⊥: Disappeared; -: Unchanged relative to previous spectrum
- ↑: Increased relative to previous spectrum; ↓: Decreased relative to previous spectrum

**Table S4** Potential parameters for molecular dynamics <sup>α</sup>

| Atom <sup>α</sup>    | Description      | q              | σ              | ε                       | Source |
|----------------------|------------------|----------------|----------------|-------------------------|--------|
| H                    | H <sub>2</sub> O | 0.410          | 0              | 0                       | [1]    |
| H <sub>S</sub>       | OH surface       | 0.425          | 0              | 0                       | [1]    |
| H <sub>B</sub>       | OH bulk          | 0.425          | 0              | 0                       | [1]    |
| O                    | H <sub>2</sub> O | -0.820         | 0.31655        | 0.65019                 | [1]    |
| O                    | O bulk           | -1.050         | 0.31655        | 0.65019                 | [1]    |
| O <sub>S</sub>       | OH surface       | -0.950         | 0.31655        | 0.65019                 | [1]    |
| O <sub>B</sub>       | OH bulk          | -0.950         | 0.31655        | 0.65019                 | [1]    |
| Fe                   | Fe bulk          | 2.100          | 0.33020        | 7.7007×10 <sup>-6</sup> | [2]    |
| Bond <sup>β</sup>    |                  | k <sup>β</sup> | b              |                         |        |
| O-H                  | H <sub>2</sub> O | 463700         | 0.100          |                         | [3-4]  |
| O-H                  | OH               | 327465         | 0.100          |                         |        |
| Bend <sup>γ</sup>    |                  | k <sup>γ</sup> | □ <sup>0</sup> |                         |        |
| H-O-H                | H <sub>2</sub> O | 383            | 109.47         |                         | [3-4]  |
| Fe-O <sub>B</sub> -H | Bulk             | 251            | 109.47         |                         | [1]    |

<sup>α</sup>. q is charge (e), σ (nm) is the finite distance at which the inter-particle Lennard-Jones potential is zero and ε (kJ/mol) is the Lennard-Jones potential well. Values of σ (nm) from R<sub>o</sub> (Å) in CLAYFF (V<sub>LJ</sub>=ε((R<sub>o,ij</sub>/r<sub>ij</sub>)<sup>12</sup>-2(R<sub>o,ij</sub>/r<sub>ij</sub>)<sup>6</sup>)) were obtained as σ=R<sub>o</sub>/10/2<sup>1/6</sup>. Those are from CHARMM-compatible.

<sup>β</sup>. k<sup>β</sup> (kJ mol<sup>-1</sup> nm<sup>-2</sup>) is the harmonic potential constant and b (nm) is the equilibrium bond length.  
<sup>γ</sup>. k<sup>γ</sup> (kJ mol<sup>-1</sup> rad<sup>-2</sup>) is the harmonic angle potential and □<sup>0</sup> (deg) is the equilibrium angle.

**Table S5** Surface Fe-O bond lengths (nm) from MD

| Surface Species <sup>α</sup> | Crystallographic <sup>5-6</sup>               | MD    |         |
|------------------------------|-----------------------------------------------|-------|---------|
|                              | 0.193                                         | 0.198 | (110) G |
| -O                           | 0.211 / 0.196                                 | 0.196 | (021) G |
|                              | 0.198                                         | 0.195 | (001) L |
|                              | 0.196, 0.196                                  | 0.200 | (110) G |
| μ-O                          | 0.193, 0.196 / 0.210, 0.211                   | 0.198 | (021) G |
|                              | 0.199, 0.199                                  | 0.202 | (010) L |
|                              | 0.199, 0.199                                  | 0.198 | (001) L |
|                              | 0.193, 0.196, 0.196 (μ <sub>3</sub> -O)       | 0.196 | (110) G |
| μ <sub>3</sub> -O            | 0.211, 0.211, 0.210 (μ <sub>3,I,II</sub> -OH) | 0.210 | (110) G |
|                              | 0.207, 0.207, 0.198                           | 0.206 | (001) L |

<sup>a</sup>Surface species were labeled in detail in Fig.2

**Table S6** MCR Analysis Results of ATR-FTIR spectra (Fig. 4)

| Components |      | Band positions (cm <sup>-1</sup> ) |      |      |      | Dominant spectra                      |
|------------|------|------------------------------------|------|------|------|---------------------------------------|
| LL         | AI   | 3667                               | 3625 | 3552 | 3534 | Aa (-13.86) <sup>a</sup> - Ae (18.17) |
|            | AII  | 3645                               | 3625 | 3552 | 3534 | Af (36.11) - Ai (312.99)              |
| RL         | BI   | 3667                               | 3626 | 3550 | 3534 | Ba (-7.85) - Be (0.24)                |
|            | BII  | 3654                               | 3626 | 3550 | 3534 | Bf (2.23) - Bk (35.67)                |
|            | BIII | 3646                               | □    | 3550 | 3534 | Bl (69.44) - Bm (141.13)              |
| G          | CI   | 3661                               | 3648 | □    | 3491 | Ca (-12.00) - Ce (0.48)               |
|            | CII  | 3658                               | 3648 | 3545 | □    | Cf (1.18) - Ci (9.11)                 |
|            | CIII | □                                  | 3648 | 3576 | □    | Cj (12.18) - Cl (17.88)               |
|            | CIV  | □                                  | □    | 3585 | □    | Cm (20.46) - Cp (217.04)              |

<sup>a</sup>. Numbers in brackets were proton concentrations in unit of protons per nm<sup>2</sup>.



## FIGURES

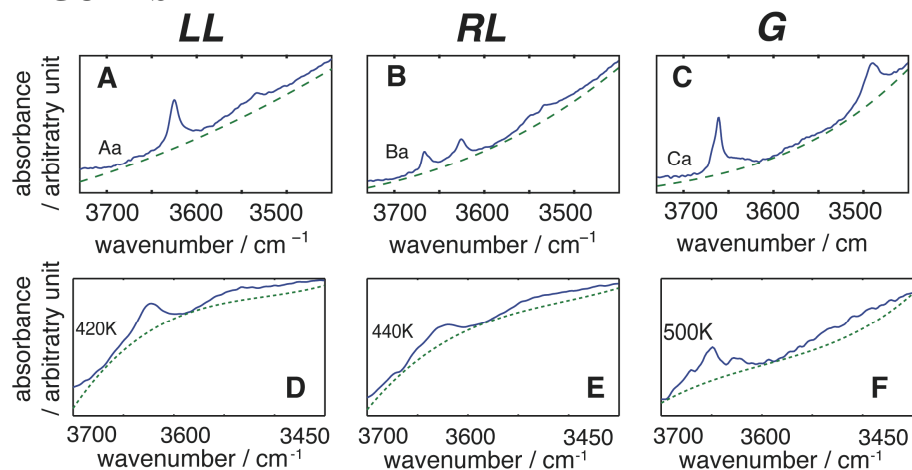

**Fig. S1** Background subtraction of ATR-FTIR and TPD spectra of evaporated different structures of FeOOH: LL (left column), RL (middle column) and G (right column). The original most alkaline spectra of synthetic LL, RL and G with each polynomial background (dash line) are plot in **A**, **B** and **C**. The spectra of highest temperature with each polynomial (dash line) are plot in **D**, **E** and **F**.

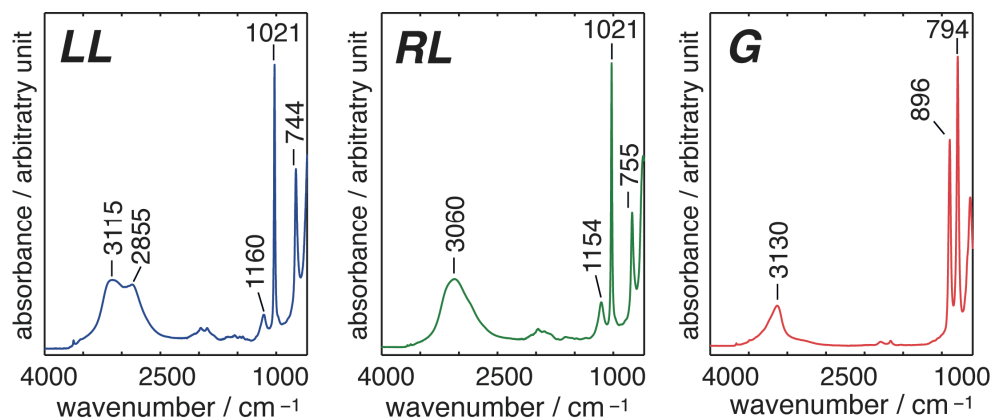

**Fig. S2** ATR-FTIR spectrum of dry dialyzed LL, RL and G. No other phases can be detected.

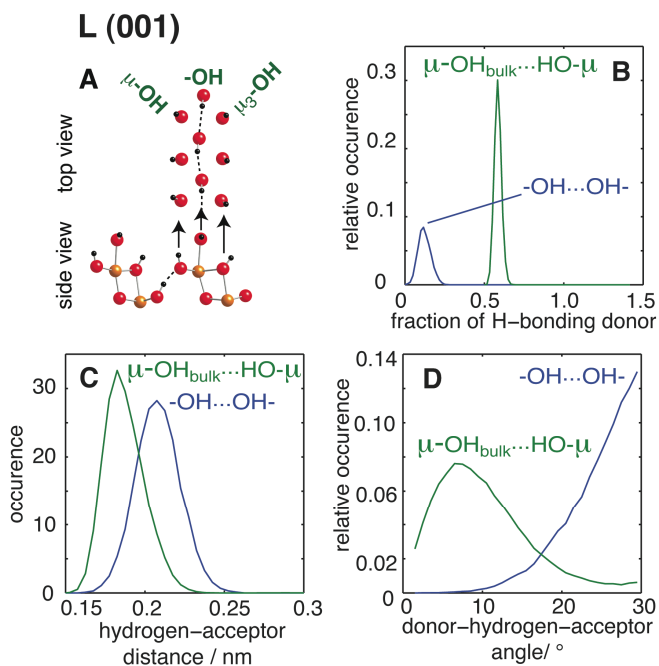

**Fig. S3** Molecular structure of (001) plane of lepidocrocite (**A**, Fe=yellow; O=red; H=black) and hydrogen bond analyzes of 5 ns MD simulations (**B-D**). The (010) plane of lepidocrocite (not shown) has only isolated hydroxyl groups.

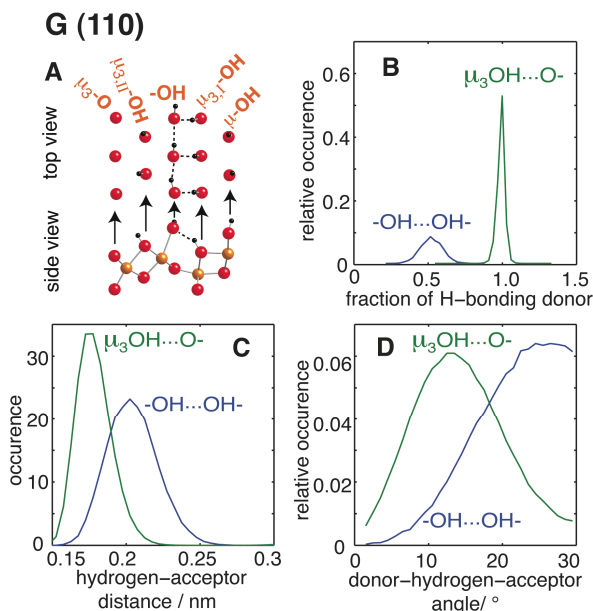

**Fig. S4** Molecular structure of (110) plane of goethite (**A**, Fe=yellow; O=red; H=black) and hydrogen bond analyzes of 5 ns MD simulations (**B-D**).

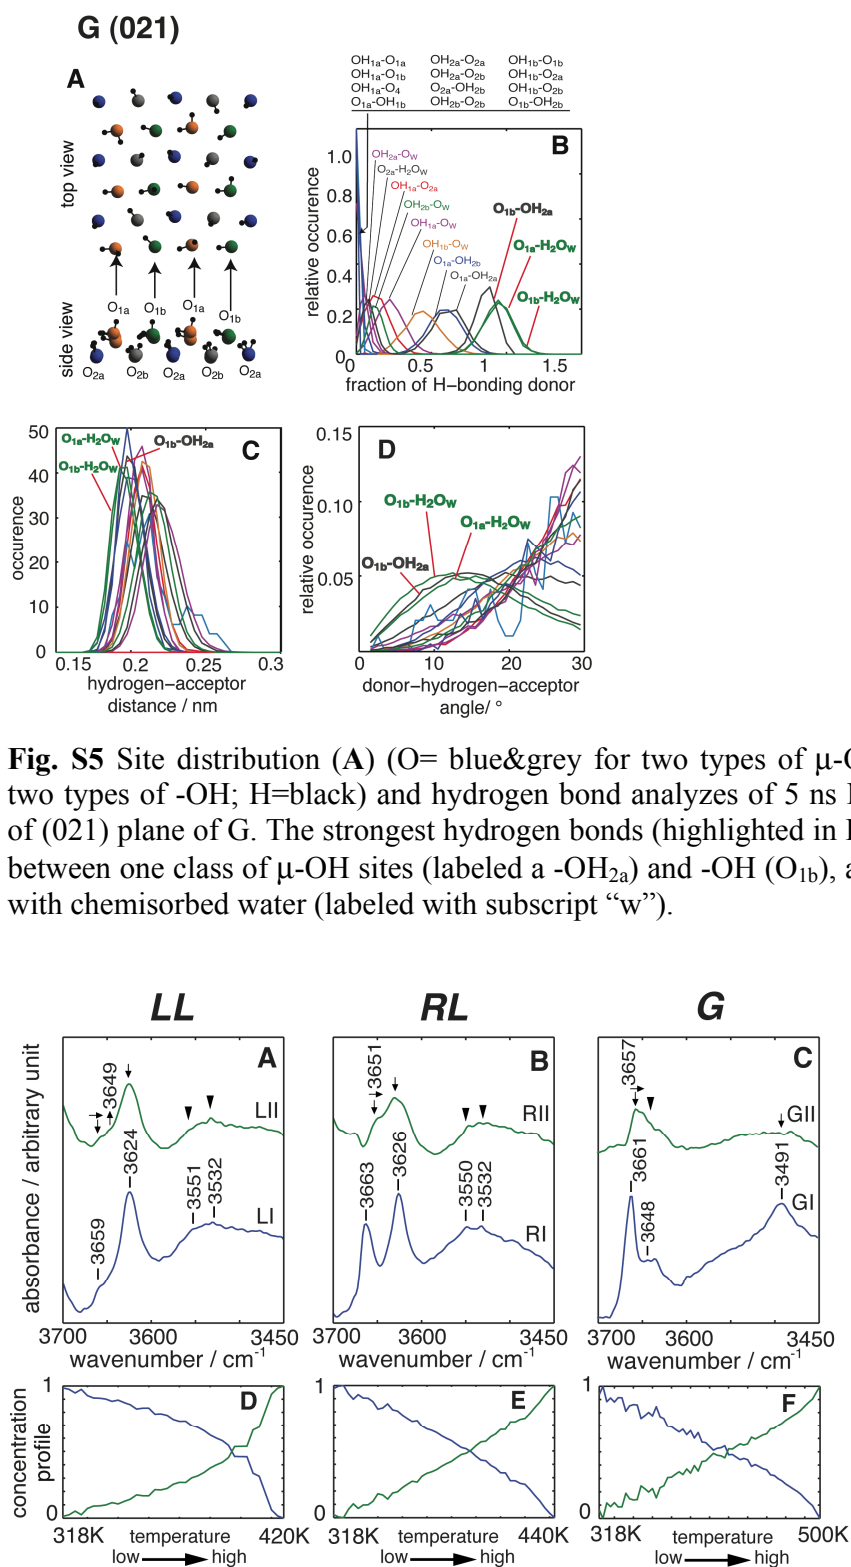

**Fig. S6** MCR spectral components of LL (**A**), RL (**B**) and G (**C**) obtained from spectra of TPD experiments (Fig. 5). Corresponding concentration profiles are shown in **D-F**.
